# Supplementary material for: High-speed and high-resolution 2D and 3D elemental imaging of corroded ancient glass by laser ablation-ICP-MS
Source: Royal Society of Chemistry journal article supplement (doi:10.1039/d2ja00337f), 2023-01-01
Supplement: d2ja00337f1.pdf [file d2ja00337f1.pdf]

Electronic Supplementary Material (ESI) for JAAS.  
This journal is © The Royal Society of Chemistry 2020

Electronic Supplementary Information for JAAS publication

**High-speed and high-resolution 2D and 3D elemental imaging of corroded ancient glass by Laser Ablation-ICP-MS**

Roberta Zanini<sup>a,b\*</sup>, Marco Roman<sup>c</sup>, Elti Cattaruzza,<sup>b</sup> and Arianna Traviglia<sup>a\*</sup>

<sup>a</sup> Center for Cultural Heritage Technology, Istituto Italiano di Tecnologia, via Torino 155, Venezia-Mestre, Italy. E-mail: [roberta.zanini@iit.it](mailto:roberta.zanini@iit.it) ; [arianna.traviglia@iit.it](mailto:arianna.traviglia@iit.it)

<sup>b</sup> Department of Molecular Sciences and Nanosystems, Ca' Foscari University of Venice, via Torino 155, Venezia-Mestre, Italy.

<sup>c</sup> Department of Environmental Sciences, Informatics and Statistics, Ca' Foscari University of Venice, via Torino 155, Venezia-Mestre, Italy.

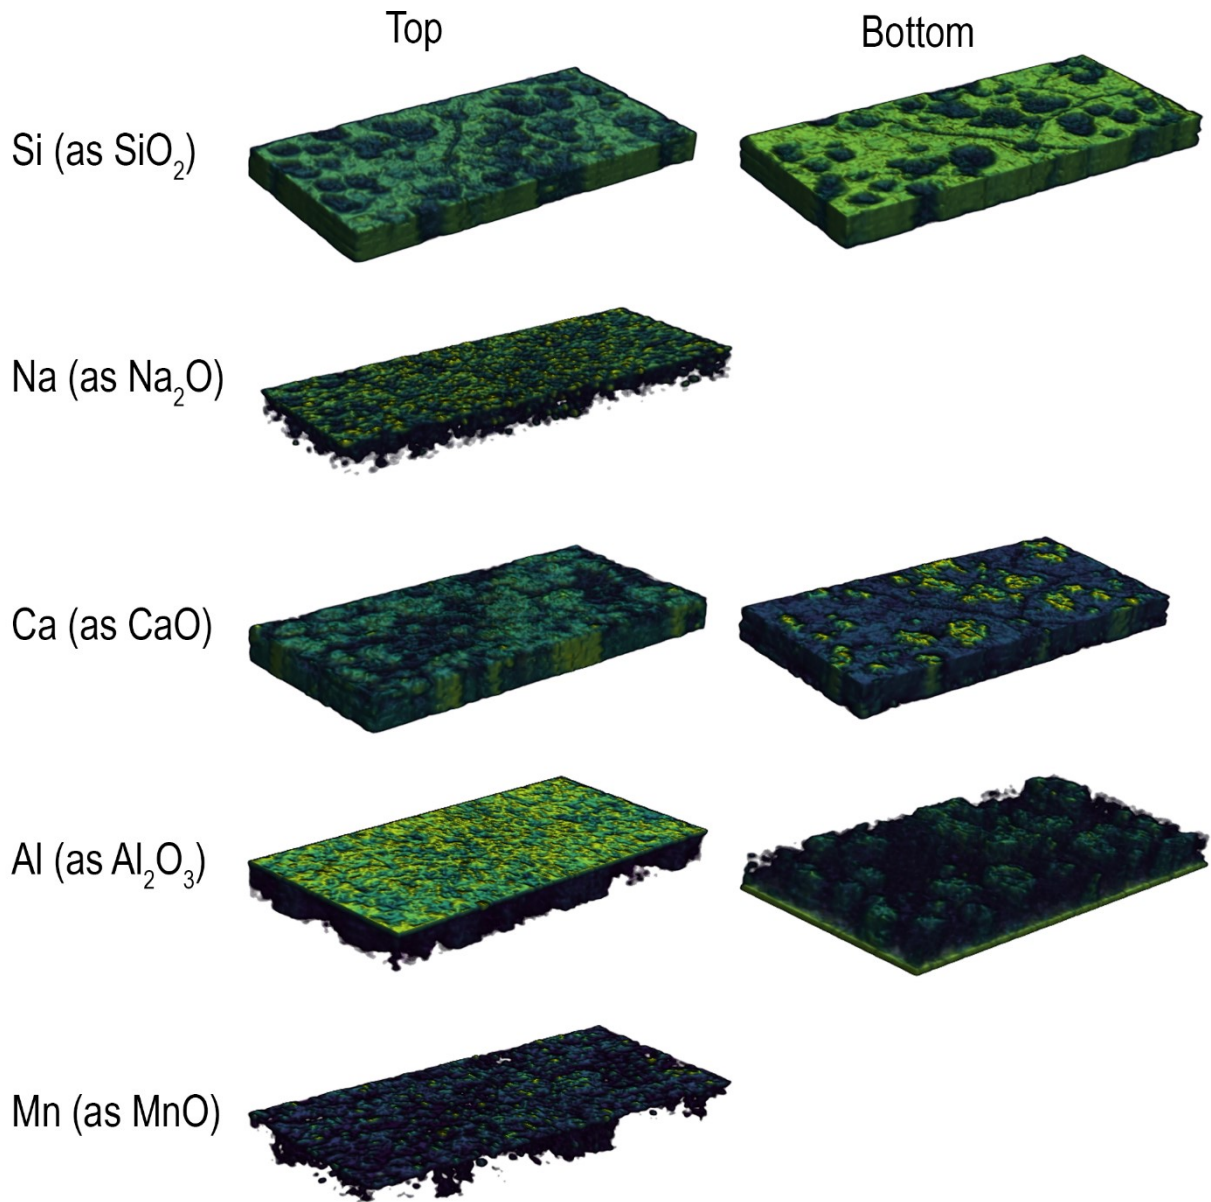

Figure S1. 3D reconstruction of the entire volume of the investigated area for each element for the pitting sample. The z axis scale is arbitrary.

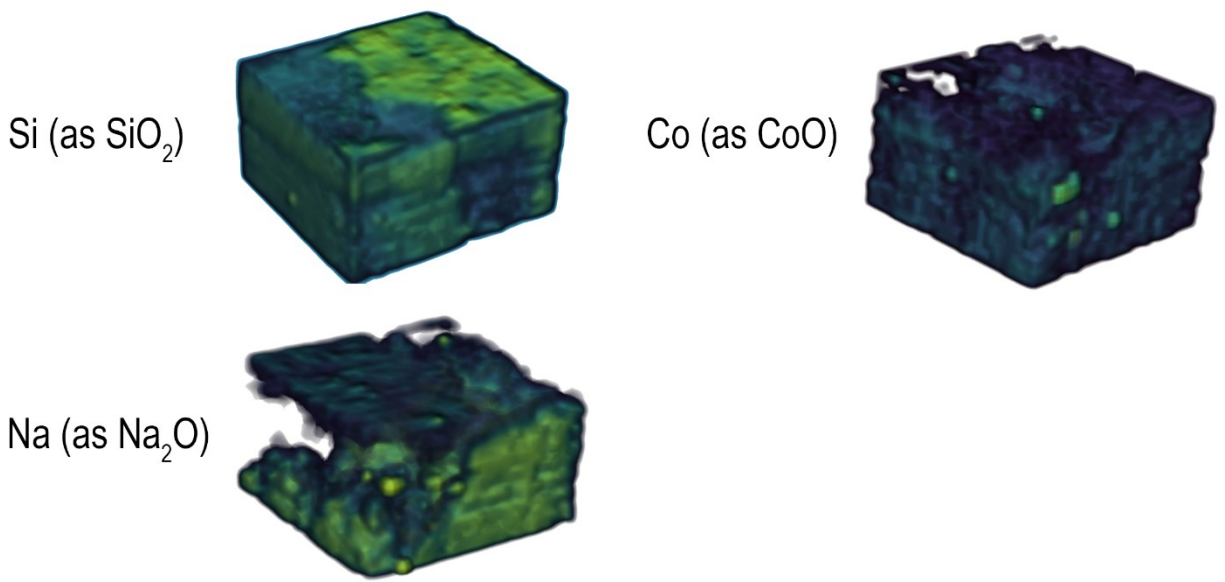

Figure S2. 3D reconstruction of the entire volume of the investigated area for each element for the sample with iridescent patina on the surface. The z axis scale is arbitrary.
